# Supplementary material
Source: PubMed Central journal article supplement (PMC6369275)
Supplement: supp_RA118.006290_141351_1_supp_244313_pj4bd4.pdf [file supp_RA118.006290_141351_1_supp_244313_pj4bd4.pdf]

**Supporting Information for:**

**Nrf1-mediated transcriptional regulation of the proteasome  
requires a functional TIP60 complex**

**Janakiram R. Vangala and Senthil K. Radhakrishnan**

Department of Pathology and Massey Cancer Center,  
Virginia Commonwealth University, Richmond, Virginia

## Figure S1

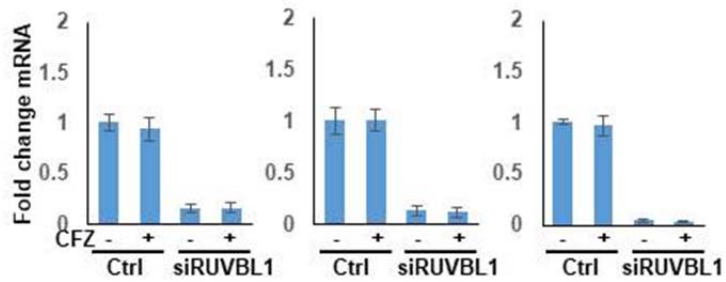

**Figure S1. Knock-down efficiency of siRNAs targeting RUVBL1.** The cell lines HCT116, MDA-MB-231, and MIA-PaCa2 were either control transfected or with siRUVBL1. Forty-eight hours later, the cells were treated with 200 nM carfilzomib (CFZ) or DMSO control for 8 hours. The cells were then harvested and subjected to quantitative RT-PCR to measure transcript levels of RUVBL1.

## Figure S2

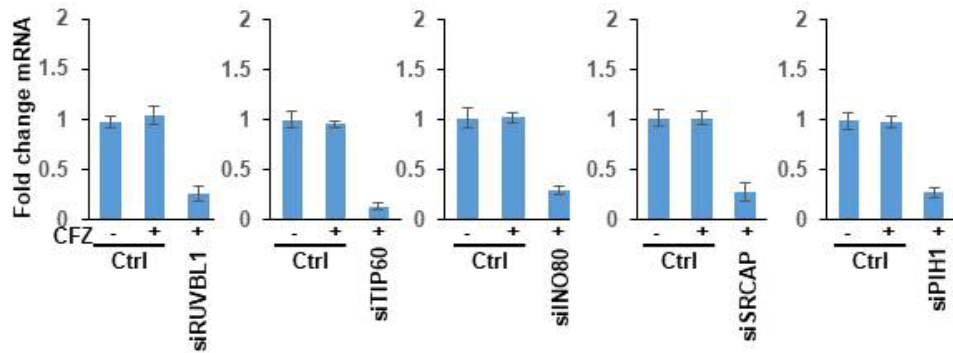

**Figure S2. Knock-down efficiency of siRNAs targeting components of various RUVBL1-containing complexes.** NIH-3T3 cells were either control transfected or with siRNAs targeting RUVBL1, TIP60, INO80, SRCAP, or PIH1. Forty-eight hours later, the cells were treated with 200 nM carfilzomib (CFZ) or DMSO control for 8 hours. The cells were then harvested and subjected to quantitative RT-PCR to measure indicated transcript levels.

**Table S1. Results from an siRNA screen in WT 8xARE-Luc screening system**

| siRNA target | Treatment         | Mean normalized Luciferase Activity | SD (n=3) |
|--------------|-------------------|-------------------------------------|----------|
| -            | DMSO              | 1.00                                | 0.12     |
| -            | Carfilzomib (CFZ) | 17.72                               | 0.84     |
| DDI2         | CFZ               | 3.27                                | 0.33     |
| Nrf1         | CFZ               | 3.17                                | 0.35     |
| p97          | CFZ               | 3.39                                | 0.28     |
| RUVBL1       | CFZ               | 3.89                                | 0.35     |
| Hsp90aa1     | CFZ               | 12.86                               | 0.65     |
| Baz1a        | CFZ               | 13.19                               | 0.74     |
| Baz1b        | CFZ               | 13.80                               | 0.82     |
| Ash1l        | CFZ               | 13.91                               | 0.56     |
| Zmynd8       | CFZ               | 13.99                               | 0.42     |
| Klf4         | CFZ               | 14.05                               | 0.36     |
| Brd1         | CFZ               | 14.42                               | 0.59     |
| Usp46        | CFZ               | 14.51                               | 0.87     |
| Brd4         | CFZ               | 14.67                               | 0.66     |
| Sqstm1       | CFZ               | 14.82                               | 0.95     |
| Hspb1        | CFZ               | 14.32                               | 0.39     |
| Hcfc1        | CFZ               | 14.60                               | 0.90     |
| Ipo11        | CFZ               | 14.63                               | 0.65     |
| Rbx1         | CFZ               | 14.70                               | 1.53     |
| Sp110        | CFZ               | 14.77                               | 0.88     |
| Smarca2      | CFZ               | 14.87                               | 1.12     |
| Sp140        | CFZ               | 14.88                               | 0.69     |
| Usp44        | CFZ               | 14.89                               | 0.37     |
| Hspa4        | CFZ               | 14.99                               | 0.45     |
| Trim28       | CFZ               | 15.13                               | 0.62     |
| Tsc1         | CFZ               | 15.36                               | 0.57     |
| Ubxn11       | CFZ               | 15.46                               | 0.64     |
| Crebbp       | CFZ               | 15.73                               | 0.53     |
| Plk1         | CFZ               | 15.80                               | 1.36     |
| Brd9         | CFZ               | 15.86                               | 2.14     |
| Baz2a        | CFZ               | 15.90                               | 0.65     |
| Ssrp1        | CFZ               | 15.97                               | 1.46     |
| Brwd3        | CFZ               | 16.23                               | 1.52     |
| Atad2        | CFZ               | 16.32                               | 0.95     |
| Brpf3        | CFZ               | 16.42                               | 0.35     |
| Brd7         | CFZ               | 16.58                               | 1.33     |
| E2f7         | CFZ               | 16.66                               | 1.87     |
| Hspa1a       | CFZ               | 16.70                               | 0.54     |
| Elk1         | CFZ               | 16.84                               | 0.66     |
| Bptf         | CFZ               | 17.39                               | 0.39     |
| Ep300        | CFZ               | 17.75                               | 0.28     |

|          |     |       |      |
|----------|-----|-------|------|
| Fli1     | CFZ | 17.77 | 0.59 |
| Hspa2    | CFZ | 17.78 | 1.33 |
| Uba3     | CFZ | 17.79 | 2.65 |
| Cecr2    | CFZ | 17.85 | 1.95 |
| Ctcf     | CFZ | 18.28 | 1.37 |
| Ewsr1    | CFZ | 18.40 | 0.87 |
| Pign     | CFZ | 18.55 | 2.57 |
| Sp100    | CFZ | 18.68 | 3.56 |
| Phip     | CFZ | 18.71 | 0.64 |
| Hectd1   | CFZ | 18.82 | 1.22 |
| Baz2b    | CFZ | 18.92 | 0.94 |
| Brd8     | CFZ | 19.44 | 0.67 |
| Fbxo5    | CFZ | 19.49 | 1.62 |
| Dnaja2   | CFZ | 19.75 | 1.25 |
| Kmt2a    | CFZ | 19.81 | 0.68 |
| Zmynd11  | CFZ | 19.91 | 1.75 |
| Kat2b    | CFZ | 20.35 | 0.69 |
| Hspa8    | CFZ | 20.51 | 1.52 |
| Usp9x    | CFZ | 20.69 | 0.53 |
| Trim66   | CFZ | 21.15 | 2.51 |
| Trim33   | CFZ | 21.22 | 0.39 |
| Trim24   | CFZ | 21.40 | 0.95 |
| Brd3     | CFZ | 21.51 | 3.43 |
| Capn9    | CFZ | 21.55 | 1.36 |
| Hsf1     | CFZ | 21.92 | 1.41 |
| Ube2m    | CFZ | 22.32 | 2.16 |
| Smarca4  | CFZ | 22.35 | 2.40 |
| Dnajc17  | CFZ | 22.60 | 0.98 |
| Kat2a    | CFZ | 22.80 | 1.43 |
| Atad2b   | CFZ | 22.81 | 1.67 |
| Brwd1    | CFZ | 22.98 | 2.29 |
| Rpn1     | CFZ | 23.27 | 1.71 |
| Brdt     | CFZ | 23.31 | 3.64 |
| Brd2     | CFZ | 23.53 | 1.58 |
| Bag6     | CFZ | 23.82 | 0.80 |
| Pbrm1    | CFZ | 23.92 | 1.69 |
| Brpf1    | CFZ | 24.59 | 2.87 |
| Taf1     | CFZ | 24.79 | 1.65 |
| Hsp90ab1 | CFZ | 25.09 | 2.36 |

**Table S2. siRNA sequences for the genes targeted in the RNAi screen**

| <b>Gene</b> | <b>siRNA sequences</b>                                                                    |
|-------------|-------------------------------------------------------------------------------------------|
| Ash1l       | GCGAAACAAUGGACAAUUA<br>CAAGUAAGCUCGAGUCUGA<br>GCUUAAGUAUUGAGUGUAA<br>UAGUUGGACUGGUUAAUAA  |
| Atad2       | GUAAUCAGCCAGUGUAUUU<br>CCUCUAAUAUUGAGAAUGA<br>CCGAAGACAGUGAAUCAA<br>AGAAAAGACAGGAUUGUUU   |
| Atad2b      | GCACAACUCUGCAAUAAA<br>GAAGAACAGUACCGAGUAA<br>GAAAAUACGUUACGAGAGU<br>GCGCUACCCUCAGAUCUAU   |
| Bag6        | GAUCUGCGCUGCAAUCUAG<br>GAGUAUCGCUGCCUUCAUC<br>CUGAAUGGGUCCCUAUUAA<br>GCACGUGGUUCGCCUAUG   |
| Baz1a       | GACCAAAGCUC AAGGCUGU<br>GAAACUCGAUCCCUAAGAG<br>GCGCACAGCUUGCCCACUU<br>CCAAUUCGGUGGUGCUUUU |
| Baz1b       | GAACGCAUUUGGACGUGUA<br>GAGGAGUGAUCUUAUUGAA<br>GAACGAAUGCGGAAACACA<br>GAGAUACUUCGAUACUUA   |
| Baz2a       | CUUAACAGCUCCACCAUUA<br>GUUAAUGGCUUAUCUACUG<br>CCAAAGAUGUCCUAGUCU<br>UCCAGAAGUUAUCAAGUA    |
| Baz2b       | GGUAUAAAUGGGUCGGUUA<br>CGAUAAUGGCUGCGGAAGA<br>CAGAGUAAGAUUAACGAAA<br>GGAACAAGGACGUCGCUAU  |
| Bptf        | GCAAGACACCGUACGAUGA<br>GAACGGAGGAUUCGACAAU<br>GAAUAAACCCUACGUUCGA<br>CCAAUGAUGCACCGGAUUA  |
| Brd1        | GACCGAAGCGAGCUGAUU<br>GGGAGGAACUCUAGCAUCC<br>AGACCAAGUCCGAGGAGAA<br>GCGGAUUGCAUUUGAUCGA   |
| Brd2        | GGAAAGGGCUCAUCGCCUA<br>CGGAAGCCCUACACUAUUA<br>GAAUUGGGAUCGAUGAAGA                         |

|       |                                                                                          |
|-------|------------------------------------------------------------------------------------------|
|       | GAGCUUGAGCGAUUUGUUU                                                                      |
| Brd3  | GGAGAGAUUUGUCAAGUCU<br>GCCACAGAUGAUUAGUG<br>GCGAAAGACUAACCAACUG<br>GGUAAUUGUUCUCGAAUUG   |
| Brd4  | GAACCUCCCUGAUUACUUA<br>CAACAAACUUCCUGGUGAG<br>AAGGAAACCUCAAGCUGAA<br>ACAUAUAGUCUAAACUAG  |
| Brd7  | CAAGAUUACCCGUAUGUUA<br>GCUACUCCAUGAUUUAUUA<br>AGCCAGAGACCAUUUAUUA<br>GCUAAUGUGUACUAAUGCA |
| Brd8  | GAUAGUAGCUGGAGUUGGU<br>CCAGUGAGCCGCCAGUUA<br>CCUAUGGAUUUGUCAACUA<br>GAGAAGGCUAUUUGUCUGA  |
| Brd9  | GGACAGGAUUAACCGUUU<br>GCUCCUGGGUAUUCAAUGA<br>GCUUUAGAUGAUGAGCAA<br>GUGAUAAUGCGAUGACGUA   |
| Brdt  | CAAGAAACAUUUGCCGUUA<br>UAAAGCAAGUAGCGAAUCU<br>CAGUCAAGUAACGGAGCA<br>CCAACAAAAGAUAGCGGUU  |
| Brpf1 | GCAACUGCCUAAAGUAUAA<br>GUAAGUACCCUCACCCAAA<br>GCAACUAAGCCACCAUAUG<br>GCAUGCAUAUCCUCACAA  |
| Brpf3 | CCAACUGCAUGAAGUAUAA<br>GCAAGACUGCGUAUUGUGA<br>GGACUUUAACCUUAUAGUU<br>CUACACCGCUUCCACGUG  |
| Brwd1 | CGAAGAGGUUGGACUGGGA<br>UCAUCGAGUCGGAGCUGUA<br>UGACCACCUACUACAGUA<br>GGUCUUGUCCAUAACAUA   |
| Brwd3 | GAACAUAGAGCAUAAUUCA<br>GGUGAUAGAUUCCGCAGUA<br>GCAAUUAACCGGAUGUAGU<br>AGACGGAACAGCAAGAAUA |
| Capn9 | GAAGCAAGACGUUCAUCAA<br>CCAGAGGAUUUCUUUGAGA<br>GGACGGCACUGAAAGCUGC<br>CUGGGAUGCUCCAUAAGUA |
| Cecr2 | GAACAGUUGCCACCGCAUA<br>CAGGUGCACUCUACUGGUA                                               |

|         |                                                                                           |
|---------|-------------------------------------------------------------------------------------------|
|         | GAGUAGAGAUCCUGCAUCG<br>GGAGGUUUUAUUAUGUAACA                                               |
| Crebbp  | GGACAGCUGUUUACCAUGA<br>GGAAUGAAGUCAAGGUUUG<br>GAAAGCAGCUGUGUACAAU<br>GCACAAGGAGGUUUUCUUU  |
| Ctcf    | GAUGAUUAUGUCACACCUUA<br>GACGAUACCCAGAUCAUAA<br>GGUCGAAGAUCAGAAUACA<br>AAAUUUGGAUCGUCACAUG |
| Ddi2    | CAAGAACGGAUUCGUCUGU<br>GCAGAAAGGUGUAACAUA<br>GGACAUACGGCCAGAGGAA<br>AGAAUUAGCAGAAGCCAUI   |
| Dnaja2  | GGGAAUGAUUUGCAUAUGA<br>CGUGAAGCCUAUAAUGAUA<br>GUCAGAUUGUGGUGAAUA<br>GGUCGAGGUGUGCGCAUUA   |
| Dnajc17 | GCAAUGCCAUAUGUGGAGUU<br>UCAAGGGCUCAGUGCUGU<br>GAGAAGAGGGUUCCTCGUCA<br>GCAGGAGAUUGCUCGACUU |
| E2f7    | GCAUCUAUGACAUCGUAAA<br>AGAAUAAGGAGGAUGCGUU<br>CGUCAGUCUCGGCGUGGAA<br>CAGUAAAGCCGGUCGACAG  |
| Elk1    | CGAAGCAGCCGGAUGAAU<br>GCUCGGGCCUCUAUUCUAC<br>GAACUCCACUAGCCCAA<br>UGUCAAGCUGAACCAGAA      |
| Ep300   | GGACUACCCUAUCAAGUAA<br>CGAGAGUACUGAUGUAACA<br>CGGCAUGCAUGUUAAGAA<br>CAAGAGCCCUGGCAUAUA    |
| Ewsr1   | GGAGAGAACCGGAGCUUGA<br>CGAAAGAAGCCUCCAAUGA<br>CUUCACAGCCGACUAGUUA<br>GACAACCAUGAUCCAUAU   |
| Fbxo5   | CAAUCAAGUCCUCCAGUC<br>GCAUGGACUUAGUAAAUCU<br>GAGAGGAUAUGUUGUGGGC<br>CCUAAAGUGGAUCGAGAAA   |
| Fli1    | GGAGUGGGCUAUAAGGAA<br>UAUAAUAGCUACAUGGAUG<br>GUUCACUGCUGGCCUAUAA<br>GGACGGGACUAUUAAGGAG   |
| Hcfc1   | GAGAAGGAGUGGAAGUGUA                                                                       |



AGAACAACAUUCCGAGGUA  
UGAAGUAGACCAGUUAUCA  
CCGGCAAGAUCAUCGAGUA

---

Hectd1 GGAAGGGACUGCUUAUAUA  
GUAGGGAACUGGUCAUUAA  
GAAGGUGGAUCGGAUAGUU  
GGAGAAAUUGCUAUUCUAU

---

Hsf1 GCUAAGUGAUCACCGGAU  
CAAGUAUGGUCGACAGUAC  
AGAACGAGCUAAGUGAUCA  
UGCGGCAGCUACAUGUA

---

Hsp90aa1 GAGCUUAACUAACGAUUGG  
GGAAUUAUCCUGAGUAU  
GAACCAAUGGGUCGUGGAA  
CAUCGGACGCUCUGGAUAA

---

Hsp90ab1 CAUCAACACUUUCUAUUCA  
GAAACAUUCGCAGUUCAUA  
UGACUGAGCCUAUUGACGA  
GAUAUGAGAGCCUGACGGA

---

Hspa1a GAUCGCCGGUCUAAACGUG  
CAUCAUCAGUGGGCUGUAC  
GCGACAAGCCCAAGGUGCA  
GCUACAAGGCCGAGGACGA

---

Hspa2 ACAUAACCUCUUGGGCAA  
CCACAGUGCAGUCCGAUUAU  
GCUGCGGAUGCCAAGCUA  
GCGAACGGGCCAUGACCAA

---

Hspa4 GCAAGUUUAUGUAGACAAA  
GACGAUCGCUAACGAGUAU  
GUAAAGAACUCAGCACAAC  
GGGCAUAAAGGUUACAUUAU

---

Hspa8 CGAUGAAGCUGUUGCCUAU  
CAAGAGAGCUGUCCGCCGU  
AGUCACAGAUCCAUGAUUAU  
UUGCUGAGUUCAAGCGAAA

---

Hspb1 GGAGAUCACUGGCAAGCAC  
CAAAGCAGUCACGCAGUC  
GGAGAUCACCAUCCGGUU  
CCUCUUCGAUCAAGCUUUC

---

lpo11 GAUAAUGUGUGUCGAGUA  
CACCAGAGCUGCUUCGUUAU  
CGAUUAGUCUCUCAUUAUU  
GGACACGAGUUUAAUCAGG

---

Kat2a AGAAAGAGAUCAUCAAGAA  
CCAUGGAGCUGGUCAAUGA  
GGACUCAGCUGCUUCAAG  
GGAUGUCGCUACCUACAAA

---

|               |                                                                                           |
|---------------|-------------------------------------------------------------------------------------------|
| Kat2b         | GCAGUAACCUCAAUUGAAC<br>UCACAUUUGCAGAUGAGUA<br>GAAGAACCAUCCAAAUGCU<br>AAACAAGCCCAGAUUCGAA  |
| Klf4          | GAGGAACUCUCUCAUGA<br>GACCUAGACUUUAUCCUUU<br>GGUCAUCAGUGUUAGCAA<br>CACCUUGCCUACACAUGA      |
| Kmt2a         | CGGCAAUUGGAGCGAGUUU<br>CCACCAAACCCACGAAGAA<br>AGACAAAGCCCUCGAAGGA<br>GCACAGUGGUCUCACGAUU  |
| Nfe2l1 (Nrf1) | GAAGAUCCCAUUCACCAAU<br>GAGGACUUGCAGCGAGUA<br>CAGUAGGGAUAGAAAGCGU<br>CAUCCUAAACCUAGAACGU   |
| Pbrm1         | CAACAUGAGUGGCUACAUI<br>GAGAGCCGCUAUAUUGAGA<br>CAUUGAAGCUCCAUCUCUA<br>GGGAUUUAUUGCUUCGAGA  |
| Phip          | UAGCAAGUAUGACAAGUA<br>GAGUCAAAAGUUCGAUCUUA<br>UAUCAUCGGUGUACUGUGU<br>UGAGAAUGGCCUAACGUUA  |
| Pign          | GGAAUGUUUAUAAUGCAUGA<br>CAUUUAAGUUGCUUUCUGA<br>GCACAAUUGCUCACAACAA<br>GGACAUGCUCUACGACCAU |
| Plk1          | CAACACGCCUGAUUCUCUA<br>UCACUCUCCUCAACUUAUU<br>GCAAGAUCGUGCCUAAGUC<br>CAGCGACUUUGUAUUUGUA  |
| Rbx1          | CAAGAAGCGCUUUGAAGUU<br>GGAACCACAUUAUGGAUCU<br>GGGACAUUGUGGUUGAUAA<br>GUAUCGAAUGUCAGGCCAA  |
| Rpn1          | GUACAUUACGAGAACAUA<br>CAACCUAGAAGUACGAGAA<br>CAUUUAUACCUACCUAGACA<br>CACCUAGGCGUGCAGAUAA  |
| RUVBL1        | GCCAUUGGGUUGCGGAUAA<br>AGACUAAGGAGGUUUAUGA<br>CUCAGGAGCUGGGCAGUAA<br>GAUCAUAGGGCUCAAGACU  |
| Smarca2       | GGAGAAAGACGUCAUGCUU<br>AGACUUACCAGAAUACUUA<br>GAGGAGGUACGGCUAAGA                          |

|         |                                                                                           |
|---------|-------------------------------------------------------------------------------------------|
|         | CCAAACCCGUCGUGAGCGA                                                                       |
| Smarca4 | GGUCAACGGUGUCCUCAA<br>GAUAAUGGCCUACAAGAUG<br>GAGCGAAUGCGGAGGCUUA<br>CAACGGGCCUUUCCUCAUC   |
| Sp100   | GAAGGAAACUCCACGAAAC<br>GGGCAAGACAGGGCGGUUA<br>UCUAAUGCGAUAGAAGUA<br>CGAGGAUACAAGCGAGCAA   |
| Sp110   | GGAAAUGGCCAGGGAAGUA<br>CCACACAAGUCCAGAGAA<br>GAAGCGCUCCGGGACAAUU<br>AGACUGGAAGGGCGUUAUA   |
| Sp140   | GUGCCGGGAUGGAGGAUUA<br>GUUUUCAGAACUCAGAUAA<br>CAAUGAGUGUACAGAGAAA<br>GAGACAAGAAGCAGGAGCA  |
| Sqstm1  | GCAUUGAGGUUGACAUUGA<br>GAACAGAUGGAGUCGGGAA<br>GGCUAUGUCCUUAUGUGAAA<br>CGCUAUAAGUGCAGUGUGU |
| Ssrp1   | GAUGGGAGGCUUCGAUUGA<br>GCGAAUCGGAGUUUGAGAA<br>CCAAACUCGUUACCACUUC<br>GCGUACAUGCUGUGGCUUA  |
| Taf1    | CAACAGAGGUCUUAUCAAC<br>GGAUACGGAUGGAAGAUAU<br>GAGAGUCAGUAUACUAAGA<br>GAGGAUAAGUUGGCACGUU  |
| Trim24  | GCAAGCGGCUGAUUACAU<br>GAUCAGCCUAGCUCAGUUA<br>CCAUAACGUUCACCUAGUG<br>AAACUGACCUUGUCGAGACU  |
| Trim28  | CUAAGAAGCUGAUCUUAUU<br>GGACAAACAUGCCACACUU<br>CAAGAGUGCUGAAGCCUUU<br>GAACCAACGUAAACUCUUG  |
| Trim33  | CAACUAACCUUCACCUAGA<br>GAACAUAGGUUUCAGUUUU<br>CGAGAGACCAGUACAUUA<br>CCUCUAUUGUCACGAAUA    |
| Trim66  | GAGGAGACCCUGCAGGUUA<br>GGACGUUUCUGGCGAGAGU<br>GAGAGAUGCCUGUGUUUAA<br>CAUAAGAAAUCCAGCCUAC  |
| Tsc1    | ACACGUUGGUUGAUUAUUA<br>CGGGAGCUGUUCGUAUA                                                  |

|           |                                                                                          |
|-----------|------------------------------------------------------------------------------------------|
|           | GUCAAACGACCGAGGAUUA<br>UCACAUCCGUUAGUAAAG                                                |
| Uba3      | GAUCCAAGCUCCAUUGUAC<br>GGGAAUGCCCGAGUGAUUU<br>CGAACCAGGCCCAAUCUUU<br>CAUGUAAAGUUCUAGUCAU |
| Ube2m     | GGAUUCAGAAGGACAUUAA<br>GAAGCCAGUCCUACGAUA<br>GUAUUCAGCUUUAAGGUGG<br>ACAUUGACCUCGAGGGCAA  |
| Ubxn11    | GAACAGGCUUCCCAAGUGU<br>GAGACUGGAUGAAGGCCAA<br>GGGAUAAGAGUCUACGGAA<br>CGACGUGCGGAAACUCUUA |
| Usp44     | GCGGAAGAGUUUACGCUUA<br>GAAUAGAUUUCUUCACGA<br>GAUAAGAUACAACGUGAAC<br>GGUACUGUAUGGUCUGCAA  |
| Usp46     | AGAACGAUCUCUUUGAUAA<br>GGUCU AACGUCAGAUUAU<br>AAUAGACGCUCAAGCCA<br>GGAACACUCACUAACGAAA   |
| Usp9x     | CGUAAUGUAUGCCAAUUUA<br>GAAUUUAGCUUCGCGGGUU<br>GAAUGUACAUGAUCUACUG<br>CUAACGAUCUCAUUUACAA |
| Vcp (p97) | GUAGAGGUGCCACAAGUAA<br>UGAAUAGAGUUGUUCGGAA<br>UAAAGUAUGGCAAACGUUA<br>ACGAUGACCUGUAUGGCUA |
| Zmynd11   | GCACGGAUGUUUAUAAAAG<br>GCAAAGAAAGGACGACGUA<br>GGAGCGGGCUAUAGACCUU<br>GCAUGUGCCACGACAAGUA |
| Zmynd8    | CGAGAUGAAUGAAAUCGAA<br>GGACAAAGACGGGCAGGUU<br>GAUGGAAGUUUACGUGGAG<br>AAACCCGGCUUACUCAACA |

**Table S3. siRNA sequences for the genes targeted in experiments other than the RNAi screen**

| <b>Gene</b>  | <b>siRNA sequences</b>                                                                    |
|--------------|-------------------------------------------------------------------------------------------|
| Mouse RUVBL1 | GCCAUUGGGUUGCGGAUAA<br>AGACUAAGGAGGUUUAUGA<br>CUCAGGAGCUGGGCAGUAA<br>GAUCAUAGGGCUCAAGACU  |
| Mouse RUVBL2 | GAAGACAGCCAUUGCCAUG<br>CACAGUACAUGAAGGAGUA<br>GCUCAAAGGCGAAACAUG<br>UGACAAGAAUCGAGCGAAU   |
| Mouse TIP60  | UGAGAUUGAUGGACGGAAA<br>GGACAUCAGUGGCCGAAAG<br>UCUACGUAAUGACGGAGUA<br>CCUGGACGGAAGCGGAAAU  |
| Mouse INO80  | CGAACAAGGUCAUUUGAUG<br>UGAACUGGUUAGCAAAUUU<br>GAAUCAACUCUCUCGUUUA<br>GCAGCUGCCCUUUGUAAA   |
| Mouse SRCAP  | CCGCAUACUGUUAGAGUA<br>CGUAAGAACUGGCGGUAUC<br>CGAAAGGCCAAGACGUGAA<br>GCUUAUCAGUGAACGGACA   |
| Mouse PIH1   | GGAGAGAACCGCCUGGUGA<br>GAACAGUGAUUUUCUUGCGG<br>GAAGAGACGGUGCGGUUUC<br>AGUAUGGCCUACAGCUAAA |
| Human RUVBL1 | GCAGAAAGAGCGAGUAGAA<br>CAAAGGAACCAAACAGUUG<br>GCCAUUGGGCUGCGAAUAA<br>AGAGGCAUGUGGCGUCAUA  |
| Human RUVBL2 | UAACAAGGAUUGAGCGAAU<br>CGCAGUACAUGAAGGAGUA<br>UCAACGAACUCAAGGCGA<br>ACGCAAGGGUACAGAAGUG   |
| Human TIP60  | GGACAGCUCUGAUGGAAUA<br>CACAGGAACUCACCACAUU<br>GAACAAGAGUUUUUCCAG<br>CCACAGAUCACCAUCAUG    |

**Table S4. Primers used in quantitative RT-PCR (qRT-PCR) and chromatin immunoprecipitation (ChIP)-qPCR assays**

| <b>Experiment</b> | <b>Gene</b>      | <b>Forward Primer (5'-3')</b> | <b>Reverse Primer (5'-3')</b> |                       |
|-------------------|------------------|-------------------------------|-------------------------------|-----------------------|
| <b>qRT-PCR</b>    | Human RUVBL1     | TTGCTCAGGAGCTGGGTAGT          | CCCATGGGATTCTCTGTCTC          |                       |
|                   | Human TIP60      | ATCCTGAGCGTGAAGGACAT          | TCTCTCTGGAGAGCCAGGAC          |                       |
|                   | Human PSMA7      | CTGTGCTTTGGATGACAACG          | CGATGTAGCGGGTGATGTACT         |                       |
|                   | Human PSMB7      | TGCAAAGAGGGGATACAAGC          | GCAACAACCATCCCTTCAGT          |                       |
|                   | Human PSMC4      | GGAAGACCATGTTGGCAAAG          | AAGATGATGGCAGGTGCATT          |                       |
|                   | Human PSMD12     | GTGCGCGACTGACTAAAACA          | TAGGCAGAGCCTCATTGCT           |                       |
|                   | Human 18S rRNA   | ATGGCCGTTCTTAGTTGGTG          | CGCTGAGCCAGTCAGTGTAG          |                       |
|                   | Mouse RUVBL1     | GAGAGCGGCCTAGCCAAG            | TCTCCATCAGCACCTCTGTC          |                       |
|                   | Mouse TIP60      | GATGAATGGGTGACTCACGA          | TTGAAGCGGAGTGTGATCTG          |                       |
|                   | Mouse INO80      | TTTCTGCGACAAACATCAGC          | ACAACCCAGAACTGCTTGCT          |                       |
|                   | Mouse SRCAP      | CAGATTCTAGTGGGGCAGGA          | TTCATGTTTGGCTTGCTCTG          |                       |
|                   | Mouse PIH1       | GACCAACTCATCGGAAGGAA          | CAGCGACGTCATAGGCAGTA          |                       |
|                   | Mouse PSMA7      | AACGTCTGTATGGCCTTTGC          | GTCCTGGGTCCTCCACTGT           |                       |
|                   | Mouse PSMB7      | CTGTCTTGGGAAGCGGATTC          | GCAACAACCATCCCTTCAGT          |                       |
|                   | Mouse PSMC4      | TGGTCATCGGTCAGTTCTTG          | CGGTGATGGTACTCAGGAT           |                       |
|                   | Mouse PSMD12     | TCACAGACCTGCCAGTCAAG          | AGGTTTTAGTCAGCCGAGCA          |                       |
|                   | Mouse 18S rRNA   | CGCGGTTCTATTTTGTGGT           | AGTCGGCATCGTTTATGGTC          |                       |
|                   | <b>ChIP-qPCR</b> | Mouse PSMA7                   | CGGTAGCCGGTACACCGCC           | ACTTGGGAAGAGGTGGCCGTC |
|                   |                  | Mouse PSMB7                   | GTGTCCAAGACAAAGGATGAG         | GACTGGGAACCTCGAGGAGA  |
| Mouse PSMD12      |                  | GCCCATTCTTGGGCCTGCC           | ATCGGCCCGCTCCGAGCCA           |                       |
